# Supplementary material
Source: Research Square preprint supplement (doi:10.21203/rs.3.rs-9321171/v1)
Supplement: Supplementary file 1 [file d40d89f191c5c6d52818d92e.xlsx]

## Sheet: Suplement
Theme	Code	Citation
Theme 1	03_diagnosis experienced as a marker of difference, leading to increased isolation and temporary decline in self-esteem	"I felt at the same time that I was an outcast—someone different from the rest of society, which may have slightly deepened my tendency toward isolation and momentarily lowered my self-esteem."
Theme 1	208_diagnosis as a source of fear related to information encountered on the internet and absence of hope for improvement	"At the same time, this diagnosis was difficult for me because it comes with stigmatization. I felt that maybe I knew what was wrong with me, but that I couldn't be helped—I thought of myself as a monster. "
Theme 1	208_diagnosis as something susceptible to oversimplification and misinformation	"I started reading many oversimplifications and falsehoods about personality disorders on the internet and I was terrified by them."
Theme 1	208_encountering one's own diagnosis as a topic on forums has a destructive effect on the individual	"After reading various forums about how people with such a diagnosis destroy others, that one should run away from them, etc., my suicidal thoughts intensified."
Theme 1	01_diagnosis as a risk of obsession and a source of negative attitude through information from the internet	"(…) but there's also the risk of becoming obsessed with this topic and burdening oneself with everything negative that is very prevalent on the internet"
Theme 1	207_diagnosis as a source of stigma	"On the one hand, it confronted me with the truth about myself, but on the other hand, I felt stigmatized."
Theme 1	210_diagnosis as a source of stigma	"After some time, however, the diagnosis became a stigma for me ."
Theme 1	207_diagnosis as something that distances one from people and creates a sense of otherness	"To this day, I think of myself as a person with a disorder, which distances me from people and gives me a sense of otherness."
Theme 1	207_diagnosis as reinforcing an entrenched negative view of oneself	"To this day, I think of myself as a person with a disorder, which distances me from people and gives me a sense of otherness."
Theme 1	203_diagnosis as a difficult experience due to knowing other people with such a diagnosis	"(…) it was a difficult information for me because I have people with BPD in my life and I know what suffering this disorder is associated with. Moreover, I also know that the prognosis for recovery is discouraging."
Theme 1	203_prior knowledge about the diagnosis associated with poor prognosis	"(…) it was a difficult information for me because I have people with BPD in my life and I know what suffering this disorder is associated with. Moreover, I also know that the prognosis for recovery is discouraging."
Theme 1	203_prior perception of diagnosis as a death sentence	"(…) at this point, it no longer sounds like a death sentence to me."
Theme 1	301_early experience of diagnosis as a verdict making normal life impossible, an irreversible situation	"At first like a sentence and no possibility of a normal life, a hopeless situation"
Theme 1	207_diagnosis as an experience difficult to accept; as a verdict	"I couldn't accept it and took it as a verdict."
Theme 1	203_diagnosis is associated with suffering	"(…) it was a difficult information for me because I have people with BPD in my life and I know what suffering this disorder is associated with. "
Theme 2	MJ001_diagnosis as a confirmation of conviction; as something that allows distinguishing PD from depression	"It confirmed my belief that my difficulties do not stem from recurrent depressive disorder, but are rather a consequence of how I perceive the world and other people."
Theme 2	MJ002_diagnosis as something that organizes symptoms	"I had features of various disorders rather than one fully developed disorder."
Theme 2	03_diagnosis as an accurate description of experiences	"It gave me the opportunity to gather information about this type of disorder—I read a lot about it, and when I recognized my difficulties in it, it became easier to find ways to cope with it and function relatively normally."
Theme 2	208_diagnosis as confirmation of the validity of one's perspective; diagnosis provides the ability to name	"It was important to me, I really wanted to find out whether there was something wrong with me, or if I was just 'looking for a problem and exaggerating,' to somehow name it."
Theme 2	204_diagnosis as something that allows self-definition in terms of behaviors and experiences	"It allowed me to place myself within a system of behaviours and experiences."
Theme 2	204_diagnosis as something helpful in defining oneself in relationships with others	"It became easier to define myself in relation to others."
Theme 2	303_diagnosis as a reference point in understanding current experiences	"Additionally, it seems to me that the ability to return to the diagnosis at various stages and understand through its lens what I am currently doing or what is happening to me was important."
Theme 2	303_diagnosis as an area not only for understanding, but also for acceptance	"Finally, it seems to me that in this process it was also important not only to understand the diagnosis but also to accept it."
Theme 2	MJ001_diagnosis brings independence from the illness	"(…) it allowed me to look at myself differently, to show that a lot really depends on me, and not on the fact that I am ill."
Theme 2	210_diagnosis as a source of relief due to the possibility of naming and treatment	"The first time I heard the diagnosis I felt great relief related to the fact that it was known what was happening to me, that it had a name and it was known how to treat it."
Theme 2	208_diagnosis as something that legitimizes the patient's problems	"It was important to me, I really wanted to find out whether there was something wrong with me, or if I was just 'looking for a problem and exaggerating,' to somehow name it."
Theme 2	208_diagnosis as something that allows one to feel suffering	"Somehow it helped me allow myself to feel that things were difficult for me and to agree to help, to acknowledge that it was important for me to receive it."
Theme 2	208_diagnosis as something that gives weight and reality to suffering	"It gave validity and authenticity to my suffering"
Theme 2	207_diagnosis as something that allows one to feel the significance of the problem	"At the same time, I think that without hearing the diagnosis it would have been difficult for me to feel the significance of my problem, and it could also be that to this day I would have minimized my condition and thus would not have made the effort to change the unhelpful situation."
Theme 2	MJ001_diagnosis changes one's perspective about oneself	"It (the diagnosis) certainly wasn't pleasant, because it exposed my difficulties, but it allowed me to look at myself differently, to show that a lot really depends on me, and not on the fact that I am ill."
Theme 2	01_accepting the diagnosis as truth about oneself	"It had great significance for me, because I considered the therapist an authority, someone who tells me the truth and knows about this."
Theme 2	304_diagnosis as a tool helpful in giving meaning to experiences and coping with them	"I think of it as a tool that can help me see certain patterns—for example, a strong need to be noticed, emotional expressiveness, dependence on others' approval—and begin to examine where this comes from and how to deal with it in a healthy way."
Theme 2	208_diagnosis as something someone needs for self-understanding	"It was important to me, I really wanted to find out whether there was something wrong with me, or if I was just 'looking for a problem and exaggerating,' to somehow name it."
Theme 2	206_diagnosis as a chance for better self-understanding	"I am glad to be aware of what is wrong with me, because I can understand myself more easily and somehow work on changing the behaviours that I don't like about myself and that make it difficult for me to function."
Theme 2	304_diagnosis does not define a person's identity	"The diagnosis does not define who I am."
Theme 2	304_diagnosis as a tool helpful in understanding specific patterns	"I think of it as a tool that can help me see certain patterns—for example, a strong need to be noticed, emotional expressiveness, dependence on others' approval (…)."
Theme 2	305_diagnosis as something that better helps understand problems	"Better understanding of problems."
Theme 2	01_diagnosis as something that gives certainty and a sense of security	"It gave me a dose of certainty and a sense of security; if something is named, it can be identified and worked on, reduced (…)."
Theme 2	01_diagnosis as broadening knowledge about oneself	"I could anchor myself in who I am, additionally beyond what I know about myself. My self-awareness grew, I could observe myself and my behaviours better."
Theme 2	208_diagnosis as a source of knowledge about oneself	"It was important to me, I really wanted to find out whether there was something wrong with me, or if I was just 'looking for a problem and exaggerating,' to somehow name it. It gave me relief and a bit more understanding of myself."
Theme 2	207_diagnosis as something that reveals the truth about oneself	"On the one hand, it confronted me with the truth about myself, but on the other hand I felt stigmatized."
Theme 2	304_belief about the content of the diagnosis as something difficult, yet possible to change	"Personality disorders are difficult, but they are not permanent and unchangeable."
Theme 2	304_diagnosis as a narrative about difficult experiences from the past	"I am also aware that every personality disorder is a story about what difficult things happened in childhood."
Theme 2	208_diagnosis as something that can be introduced into discourse with parents, which will make problems real	"I also had something to tell my parents so that they would acknowledge my problems as real."
Theme 3	MJ001_diagnosis as something unpleasant	"It (the diagnosis) certainly wasn't pleasant, because it exposed my difficulties (…)."
Theme 3	MJ002_diagnosis as a surprise	"I didn't come to psychotherapy for a diagnosis, so I didn't see that something like a diagnosis was awaiting me at all."
Theme 3	MJ002_diagnosis as something helpful, but terrifying	"The fact that I received it was helpful, terrifying but helpful (…)"
Theme 3	203_knowledge from the therapist about the diagnosis as reassuring, giving hope	"However, my therapist reassured me that in my case this disorder is not highly advanced and I have a good chance of functioning normally, and that the therapy I am in gives me this chance."
Theme 3	203_gratitude for the diagnosis	"Ultimately, I am grateful that I have this awareness of my disorder, and at this point it no longer sounds like a death sentence to me."
Theme 3	01_diagnosis as something that gives certainty and a sense of security	"It gave me a dose of certainty and a sense of security; if something is named, it can be identified and worked on, reduced (…)"
Theme 3	03_diagnosis as relief	"On the one hand, I felt a kind of relief, because it was another voice saying that I suffer from a personality disorder (from a specialist)."
Theme 3	210_diagnosis as a source of relief due to the possibility of naming and treatment	"The first time I heard the diagnosis I felt great relief related to the fact that it was known what was happening to me, that it had a name and it was known how to treat it."
Theme 3	302_diagnosis as a source of curiosity and stimulus for seeking information	"When I heard the diagnosis for the first time, I wanted to know as much as possible about it/watch videos, read."
Theme 3	04_diagnosis as something surprising	"In a sense, I was surprised by this information, because I expected that I was suffering from depression in a general sense."
Theme 3	206_diagnosis as something positive	"Only when I started going to therapy and when I was about 21 years old did I hear the diagnosis of borderline and I began to read more about it and I agree. I am glad to be aware of what is wrong with me, because I can understand myself more easily and somehow work on changing the behaviours that I don't like about myself and that make it difficult for me to function. In therapy about a year ago…
Theme 3	207_diagnosis (narcissistic personality) as something shocking	"When I heard the diagnosis: narcissistic personality, I experienced shock."
Theme 3	01_great significance in relation to the attitude toward the person who communicated the diagnosis	"It had great significance for me, because I considered the therapist an authority, someone who tells me the truth and knows about this."
Theme 3	208_therapist as a person providing support and help in connection with the diagnosis	"Fortunately, I came with this to my therapist, who supported me and explained many things, assured me that she is here to help."
Theme 3	208_therapist as a person explaining the meaning of the diagnosis	"Fortunately, I came with this to my therapist, who supported me and explained many things, assured me that she is here to help."
Theme 3	04_diagnosis as something around which the therapeutic relationship is built	"This prompted me, at my psychotherapist's suggestion, to discontinue pharmacological treatment."
Theme 3	206_diagnosis as something that comes from the therapist	"Only when I started going to therapy and when I was about 21 years old did I hear the diagnosis of borderline and I began to read more about it and I agree."
Theme 3	303_feeling understood by the therapist as more significant than diagnosis as the name of a disorder	"The naming of the disorder itself was not important, but it seems to me that in the first years of therapy it was important for me to understand that my therapist understands what ails me."
Theme 3	203_therapist as the person deciding the moment to communicate the diagnosis	"I received the diagnosis only after about 2 years in therapy."
Theme 4	MJ002_independent searching for a diagnosis on the internet increases anxiety	"The fact that I received it was helpful, terrifying but helpful, because I read about it on the internet, the internet as always showed me horrible scenarios, reality turned out to be easier."
Theme 4	01_diagnosis as a risk of obsession; diagnosis as a source of negative attitude through information from the internet	"…but there is also a risk of obsession with the topic and blaming oneself for everything negative that is very present on the internet."
Theme 4	208_diagnosis as a source of terror in connection with encountering information posted on the internet and lack of hope for change	"At the same time, such a diagnosis was difficult for me, because it is associated with stigmatization, I started reading on the internet a lot of simplifications and untruths about personality disorders and I was terrified by this, I felt that maybe I know what is wrong with me, but I cannot be helped, I thought of myself that I am a monster. After reading various forums about how people with su…
Theme 4	210_diagnosis as a source of stigmatization in connection with content from the internet	"After some time, however, the diagnosis became a stigma for me because I probably read too much about it on the internet."
Theme 5	MJ002_diagnosis as something helpful in being in therapy	"It also helped me understand what to think about in terms of psychotherapy, what to talk about, even what I read on the internet helped me know what to talk about in therapy, what topics to introduce, because at the beginning of therapy I didn't know what to talk about."
Theme 5	205_diagnosis as an indicator of what kind of help to seek	"I knew the diagnosis earlier (MMPI + SCID) and based on it I was looking for therapy."
Theme 5	03_diagnosis as a chance to find ways of better functioning	"It gave me the opportunity to gather information about this type of disorder—I read a lot about it, and when I recognized my difficulties in it, it became easier to find ways to cope with it and function relatively normally."
Theme 5	204_diagnosis as justification for the need to undertake psychotherapy	"It also justified the need to undertake psychotherapy."
Theme 5	303_diagnosis as an important reference point that one can return to at different stages of therapy	"Additionally, it seems to me that the ability to return to the diagnosis at various stages and understand through its lens what I am currently doing or what is happening to me was important."
Theme 5	206_diagnosis/diagnoses as something that determines psychotherapy	"In therapy about a year ago it also emerged that I might have ADHD, which was confirmed, and now I am working on changes and I am very happy, because due to my suicidal thoughts I cannot take ADHD medication now, and I manage to achieve a lot with therapy alone."
Theme 5	01_diagnosis as an area for work and improvement	"I could anchor myself in who I am, additionally beyond what I know about myself. My self-awareness grew, I could observe myself and my behaviours better. It gave me a dose of certainty and a sense of security; if something is named, it can be identified and worked on, reduced (...)."
Theme 5	208_diagnosis as something helpful in recognizing the need for help and reaching out for help in connection with suffering	"Somehow it helped me allow myself to feel that things were difficult for me and to agree to help, to acknowledge that it was important for me to receive it."
Theme 5	207_diagnosis as something that motivates change in a difficult situation; a necessary condition	"At the same time, I think that without hearing the diagnosis it would have been difficult for me to feel the significance of my problem, and it could also be that to this day I would have minimized my condition and thus would not have made the effort to change the unhelpful situation."
Theme 5	207_diagnosis (narcissistic personality) as motivation for effort	"At the same time, I think that without hearing the diagnosis it would have been difficult for me to feel the significance of my problem, and it could also be that to this day I would have minimized my condition and thus would not have made the effort to change the unhelpful situation."
Theme 5	MJ001_diagnosis gives agency	"It (the diagnosis) certainly wasn't pleasant, because it exposed my difficulties, but it allowed me to look at myself differently, to show that a lot really depends on me, and not on the fact that I am ill."
Theme 5	MJ001_diagnosis proved to be helpful in the long term	"Overall, receiving it was helpful for me in the longer perspective."
Theme 5	206_diagnosis enables work on changing problematic behaviors	"I am glad to be aware of what is wrong with me, because I can understand myself more easily and somehow work on changing the behaviours that I don't like about myself and that make it difficult for me to function."
Theme 5	206_diagnosis as something that enables a different approach to the problem	"In therapy about a year ago it also emerged that I might have ADHD, which was confirmed, and now I am working on changes and I am very happy, because due to my suicidal thoughts I cannot take ADHD medication now, and I manage to achieve a lot with therapy alone."
Theme 5	04_diagnosis as one of the factors in changing attitude toward treatment	"This prompted me, at my psychotherapist's suggestion, to discontinue pharmacological treatment."
Theme 6	MJ002_initial experience that was frightening turned out to be helpful in terms of talking in therapy (about oneself); the role of diagnosis in indicating what to talk about is particularly emphasized	"The fact that I received it was helpful, terrifying but helpful, because I read about it on the internet, the internet as always showed me horrible scenarios, reality turned out to be easier. I had features of various disorders rather than one fully developed disorder. It also helped me understand what to think about in terms of psychotherapy, what to talk about, even what I read on the internet…
Theme 6	203_therapy as something that provides perspective on changing the diagnosis	However, my therapist reassured me that in my case this disorder is not highly advanced and I have a good chance of functioning normally, and that the therapy I am in gives me this chance.
Theme 6	206_diagnosis as something that undergoes reformulation over time	"Since I was 14 years old, I had been given various diagnoses—anorexia, bulimia, depression, and obsessive-compulsive disorder. No medication helped and I still felt bad. Only when I started going to therapy and when I was about 21 years old did I hear the diagnosis of borderline."
Theme 6	207_getting familiar with the diagnosis requires time	"When I heard the diagnosis: narcissistic personality, I experienced shock. I could not come to terms with it and treated it like a sentence. I struggled to come to terms with this diagnosis for a long time."
Theme 6	208_diagnosis as something that gives more in the long term, although at the given moment it poses a difficulty	"Ultimately, I think that receiving the diagnosis was difficult, but important and necessary, and in the long term it gave me more than it temporarily made things difficult. It gave validity and authenticity to my suffering."
Theme 6	203_diagnosis unpleasant, but has positive potential	"It was difficult information for me, because I have people with BPD in my life and I know what suffering this disorder is associated with, moreover I also know that the prognosis for recovery is discouraging. However, my therapist reassured me that in my case this disorder is not highly advanced and I have a good chance of functioning normally, and that the therapy I am in gives me this chance. …
Theme 6	210_change in perspective on diagnosis from favorable to unfavorable	"The first time I heard the diagnosis I felt great relief related to the fact that it was known what was happening to me, that it had a name and it was known how to treat it. After some time, however, the diagnosis became a stigma for me because I probably read too much about it on the internet."
Theme 6	207_hearing the diagnosis is something that is experienced ambivalently – the person sees both negative and positive impact on their life	"On the one hand, it confronted me with the truth about myself, but on the other hand I felt stigmatized. To this day I think of myself as a person with a disorder, which distances me from people and gives me a sense of being different. At the same time, I think that without hearing the diagnosis it would have been difficult for me to feel the significance of my problem, and it could also be that…
Theme 6	MJ002_life experience of diagnosis as something to go through despite initial anxiety	"It (the diagnosis) certainly wasn't pleasant, because it exposed my difficulties, but it allowed me to look at myself differently, to show that a lot really depends on me, and not on the fact that I am ill. Overall, receiving it was helpful for me in the longer perspective."
Theme 6	301_initial experience of diagnosis as a sentence preventing normal life, a final situation	"Initially like a sentence and a lack of possibility for a normal life, such a situation with no way out."
Theme 6	203_earlier perception of diagnosis as a death sentence	Ultimately, I am grateful that I have this awareness of my disorder, and at this point it no longer sounds like a death sentence to me."
Theme 6	304_diagnosis does not define a person's identity	"The diagnosis does not define who I am."
Theme 6	MJ001_diagnosis proved to be helpful in the long term	"Overall, receiving it was helpful for me in the longer perspective."
Theme 6	203_attitude toward diagnosis changed over time from negative to positive	"It was difficult information for me, because I have people with BPD in my life and I know what suffering this disorder is associated with, moreover I also know that the prognosis for recovery is discouraging. However, my therapist reassured me that in my case this disorder is not highly advanced and I have a good chance of functioning normally, and that the therapy I am in gives me this chance. …
