# Supplementary material
Source: Research Square preprint supplement (doi:10.21203/rs.3.rs-9321171/v1)
Supplement: Supplementary file 1 [file f3951ccbeaadf0c8ab0e2467.docx]

*Supplementary Material*

**Table S1. Detailed characteristics of interview participants**

|  | Interview patients (n = 17) |
| --- | --- |
| Age, mean (SD) | 33,5 (8,37) |
| Gender, n (%) |  |
| Female | 13 (76,50) |
| Male | 4, (23,50) |
| Education, n (%) |  |
| Primary education | 1 (5,9) |
| Lower secondary (vocational) | 1 (5,9) |
| General secondary | 1 (5,9) |
| Higher education – Bachelor’s degree | 2 (11,8) |
| Higher education – Master’s degree | 11 (64,7) |
| Doctoral or postdoctoral studies | 1 (5,9) |
| Relationship status, n (%) |  |
| Single | 5 (29,4) |
| Cohabiting relationship | 9 (52,9) |
| Married | 3 (17,6) |
| Has children, n (%) |  |
| Yes | 4 (23,5) |
| No | 13 (76,5) |
| Employment status, n (%) |  |
| Student only | 0 |
| Studying and employed | 3 (17,6) |
| Unemployed | 1 (5,9) |
| Homemaker / caregiving | 0 |
| Employed (full- or part-time) | 13 (76,4) |
| Retired | 0 |
| Disability pension | 0 |
| Place of residence, n (%) |  |
| Rural area | 1 (5,9) |
| Small rural town | 0 |
| Town < 5,000 residents | 0 |
| Town 5,000–50,000 residents | 2 (11,8) |
| City 50,000–200,000 residents | 0 |
| City > 200,000 residents | 14 (82,3) |
| Living arrangement, n (%) |  |
| Alone | 5 (29,4) |
| With parents | 2 (11,8) |
| With non-related flatmates | 2 (11,8) |
| With partner and child(ren) | 7 (41,1) |
| Multigenerational household | 0 |
| Other | 1 (5,9) |
| History of psychotherapy – total duration (years) | 4,84 (3,11) |
| History of psychiatric hospitalization, n (%) |  |
| Yes | 7 (35,0) |
| How many times? | 2 (1) |
| No | 10 (65,0) |
| Prefer not to say | 0 |
| History of psychiatric medication, n (%) |  |
| Yes | 15 (88,0) |
| No | 2 (12,0) |
| Prefer not to say | 0 |
| Chronic somatic illness, n (%) |  |
| Yes | 4, (24,0) |
| No | 13 (76,0) |
| Prefer not to say | 0 |
| Therapy-related variables |  |
| Duration of current TFP (mean months, SD) | 35,5 (25,6) |
| Frequency of sessions (once or twice weekly) | 2x |
| Type of diagnosis | Borderline PD (n = 5); narcissistic PD (n = 2); mixed PD (n = 3); PD not specified (n = 5); histrionic PD (n = 1); comorbid depression in personality disorders (n = 1). |
